# Supplementary material for: Yeast Sirtuin Family Members Maintain Transcription Homeostasis to Ensure Genome Stability
Source: PubMed Central journal article supplement — Cell Rep. Author manuscript; Available in PMC 2019 Jul 19. (PMC6640630; doi:10.1016/j.celrep.2019.05.009), 2019-06-04
Supplement: NIHMS1531056-supplement-1.pdf [file NIHMS1531056-supplement-1.pdf]

**Cell Reports, Volume 27**

**Supplemental Information**

**Yeast Sirtuin Family Members Maintain  
Transcription Homeostasis  
to Ensure Genome Stability**

**Jessica L. Feldman and Craig L. Peterson**

# Figure S1

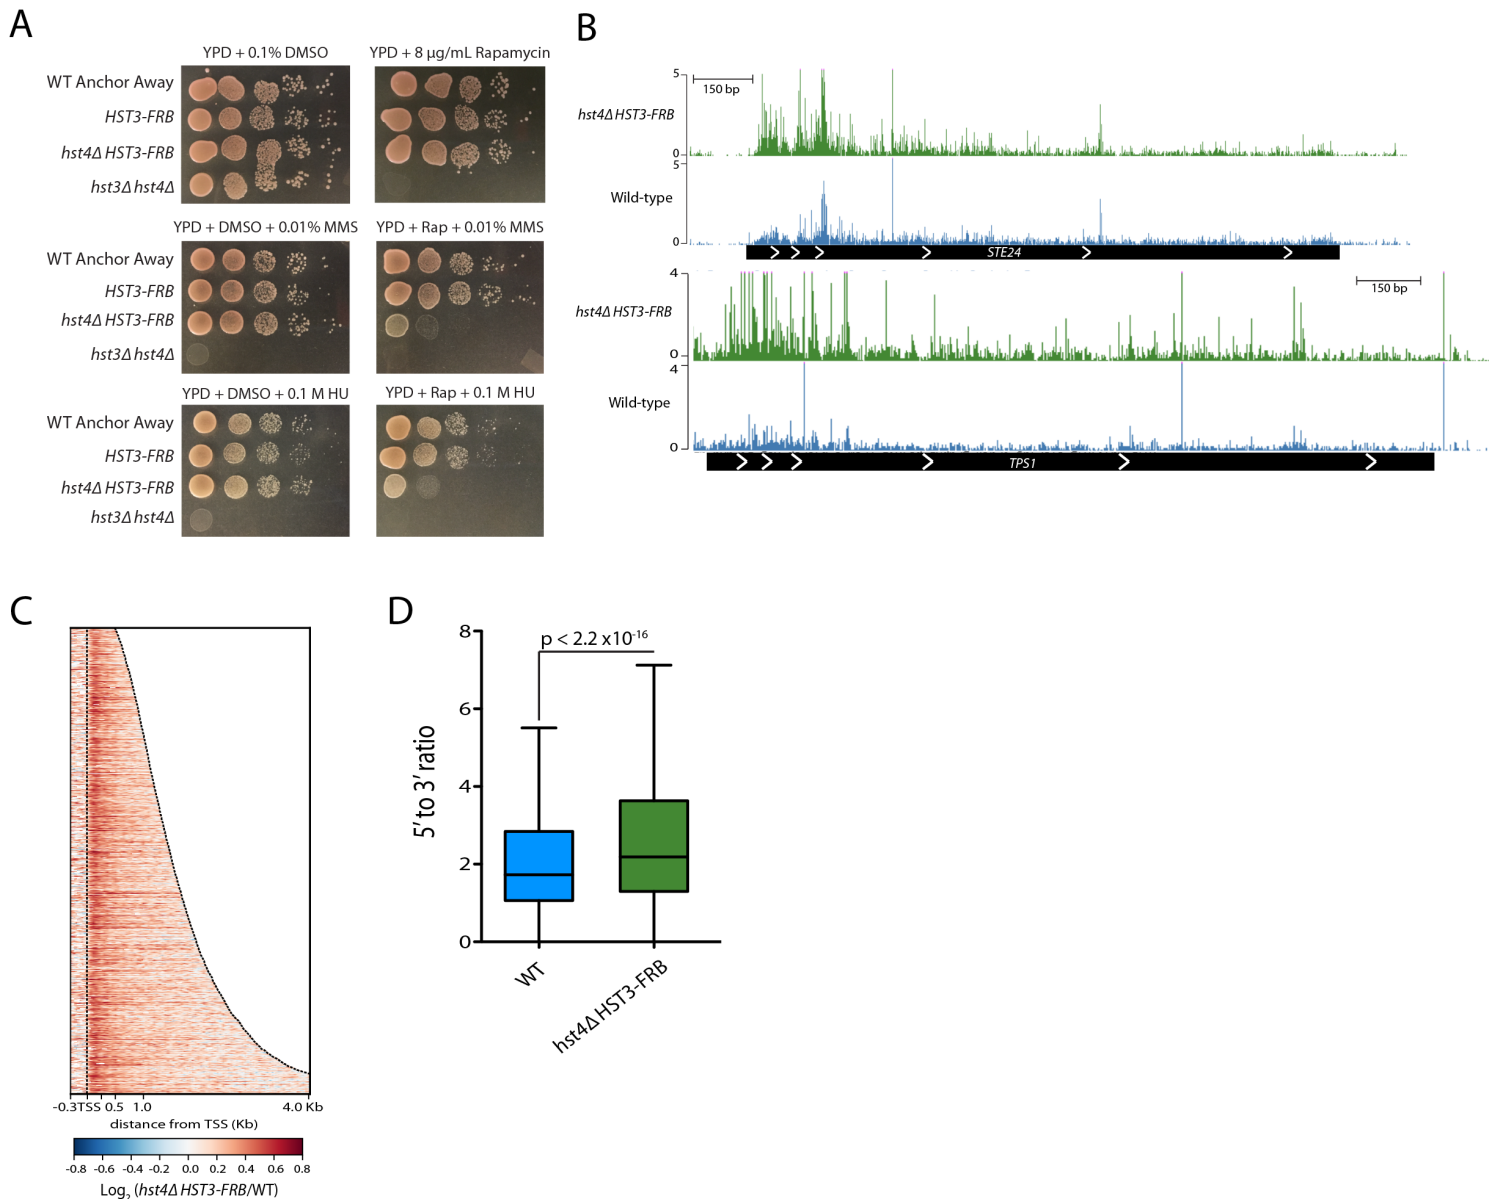

**Figure S1. Hst3 and Hst4 maintain genome stability and regulate transcription, related to Figure 1. (A)** WT anchor away, HST3-FRB, hst4Δ HST3-FRB, or hst3Δ hst4Δ strains were spotted (1/10 dilutions) on 2% glucose media containing either DMSO solvent or 8 μg/mL rapamycin (Rap), in the presence or absence of 0.01% Methyl methanesulfonate (MMS) or 0.1 M hydroxyurea (HU) and then grown for 3 days at 30°C. Note that the hst3Δ hst4Δ strain does not harbor the tor1-1 allele, and therefore it does not grow on rapamycin media. **(B)** Representative genome browser views of *S. pombe*-normalized NET-seq reads for WT (blue) and hst4Δ HST3-FRB (green). **(C)** Heatmap displaying the log<sub>2</sub> fold change between hst4Δ HST3-FRB and WT NET-seq reads from -0.3 kb from TSS to 4 kb downstream ordered by gene length. Black dotted lines represent TSS and TTS, respectively. **(D)** Box plot of the 5' to 3' ratios for WT and hst4Δ HST3-FRB calculated by summing the reads from TSS to +250 bp divided by the sum of the reads from -250 bp from TTS to TTS. p-value determined by Mann-Whitney U-test. Four biological replicates for WT and three biological replicates for hst4Δ HST3-FRB.

**Figure S2**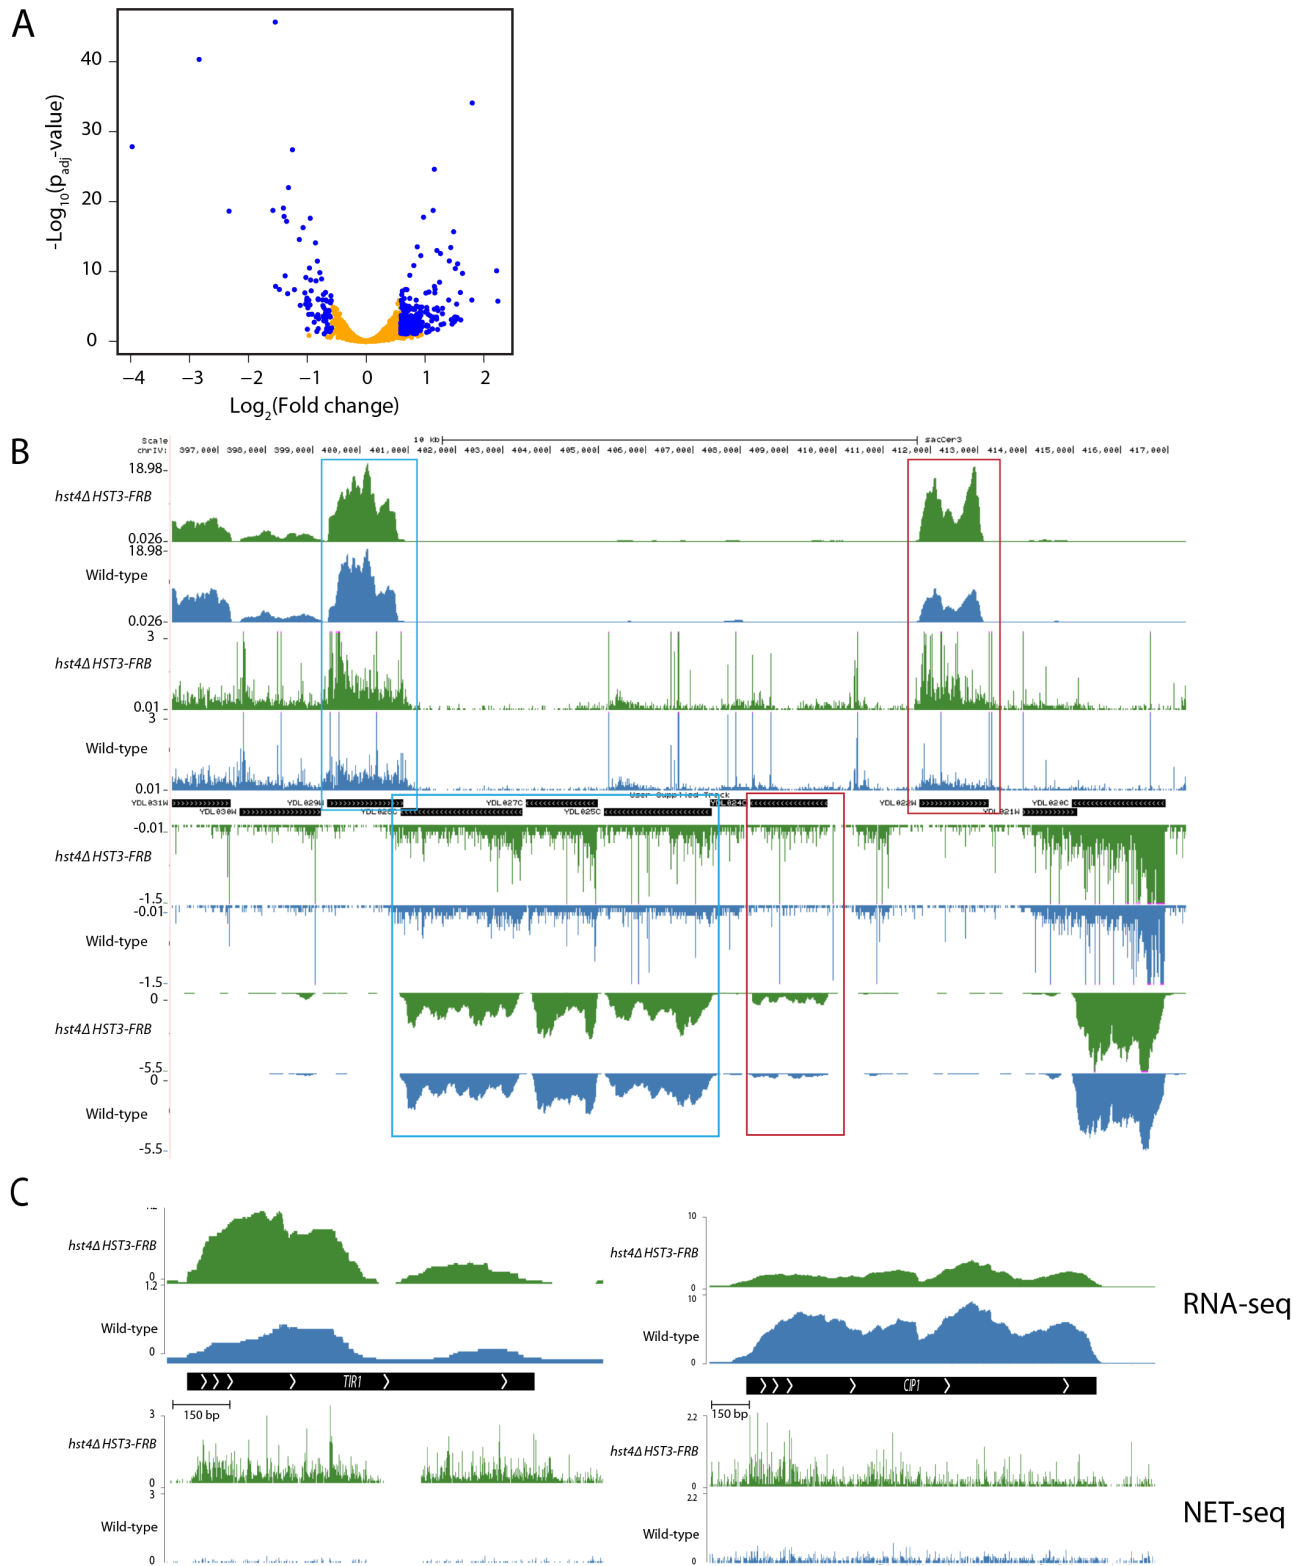

**Figure S2. Steady-state mRNAs are minimally affected by loss of Hst3 and Hst4, related to Figure 3. (A)** Volcano plot shows ORF transcripts that change significantly in the *hst4Δ HST3-FRB* mutant by RNA-seq. Significant genes are highlighted in blue ( $p_{Adj} \leq 0.1$ ,  $\text{Log}_2$  fold change  $\geq 0.59$  or  $\leq -0.59$ ). **(B)** Representative genome browser view comparing NET-seq and RNA-seq reads for WT (blue) and *hst4Δ HST3-FRB* (green). Red boxes highlight genes with increased NET-seq and RNA-seq reads in the *hst4Δ HST3-FRB* mutant. Blue boxes highlight genes with increased NET-seq reads in the *hst4Δ HST3-FRB* mutant, but not change by RNA-seq. **(C)** Zoomed-in genome browser view comparing NET-seq and RNA-seq reads for two representative genes for WT (blue) and *hst4Δ HST3-FRB* (green) mutants. Left, nascent and steady-state RNA increased in *hst4Δ HST3-FRB* mutant for the *TIR1* gene. Right, Nascent RNA increased in *hst4Δ HST3-FRB* mutant for the *CIP1* gene, but decreased steady-state RNA.

# Figure S3

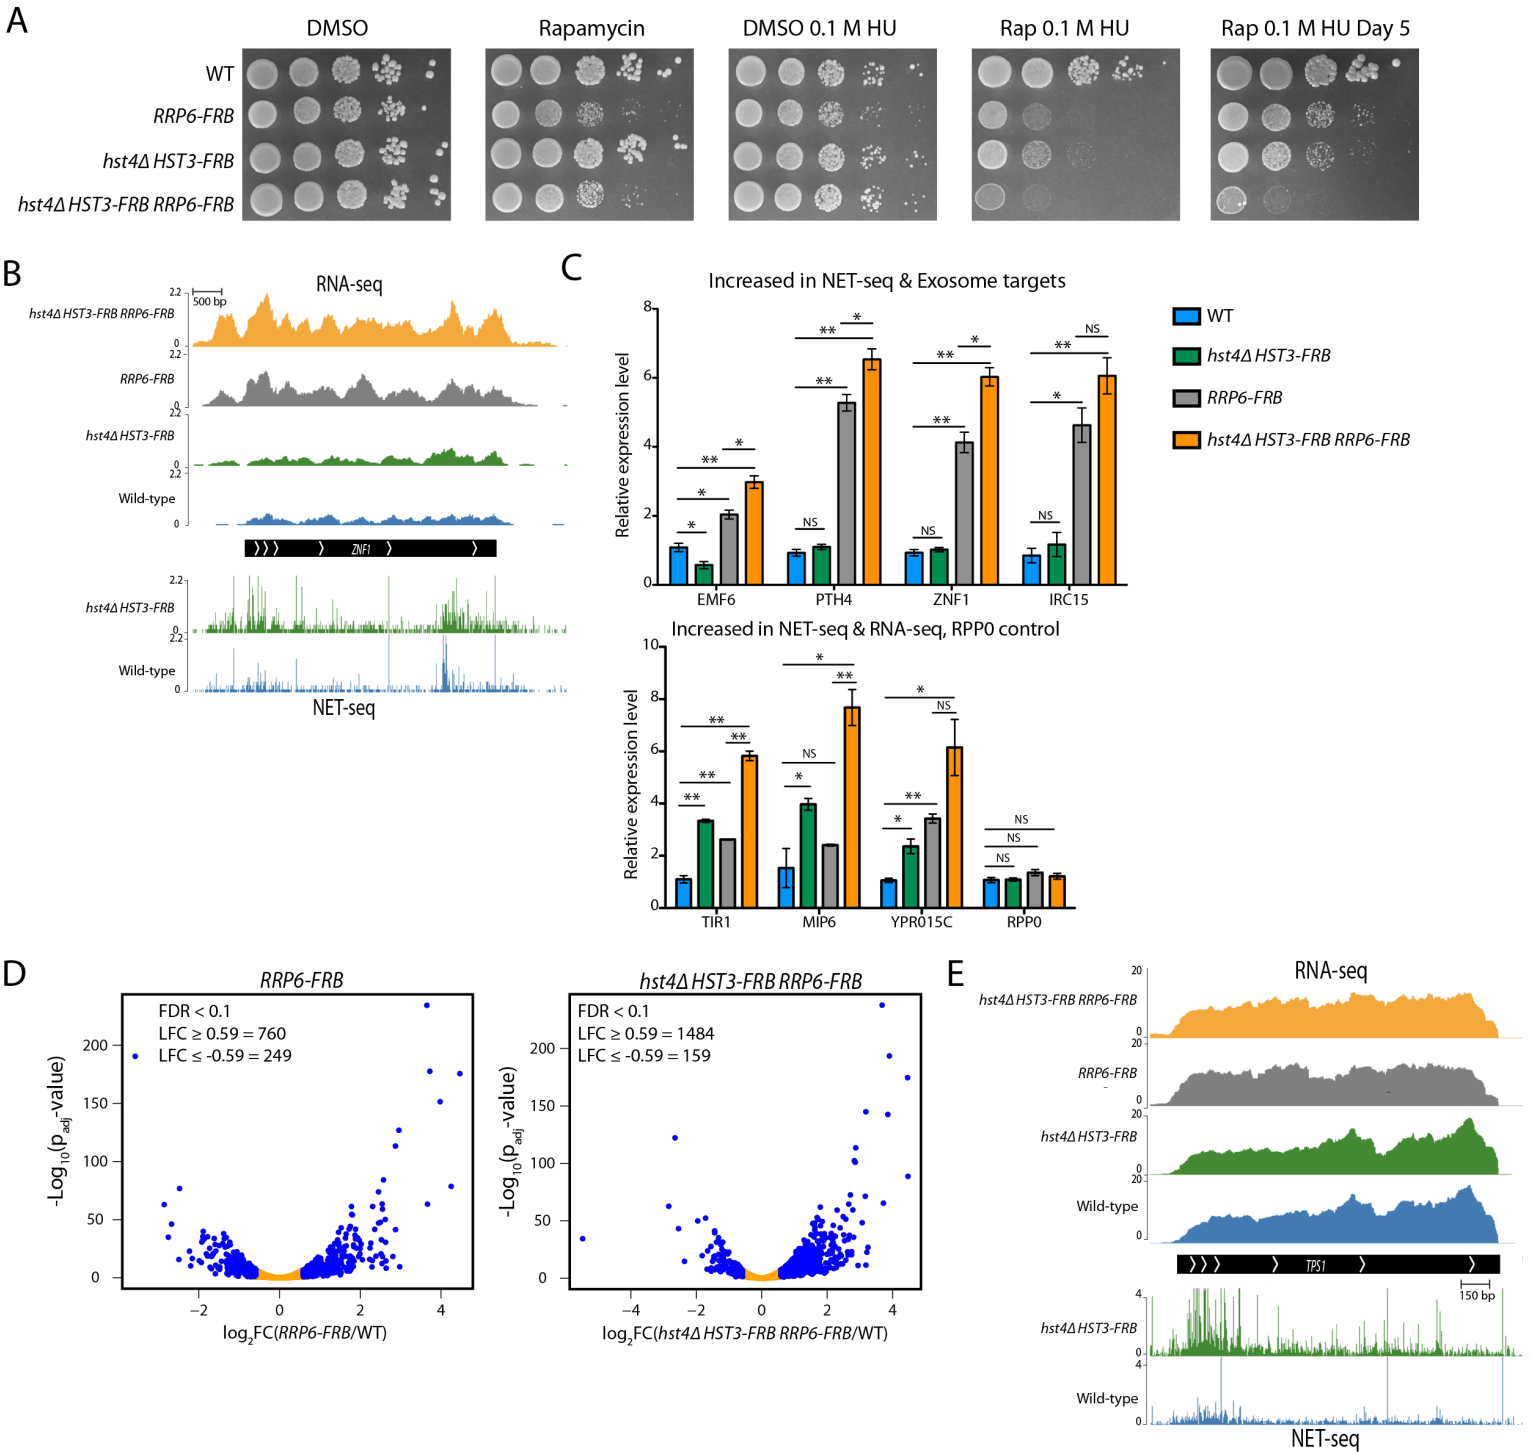

**Figure S3. Nuclear exosome represses increased transcription in the *hst4Δ HST3-FRB* mutant, related to Figure 4. (A)** WT anchor away, RRP6-FRB, *hst4Δ HST3-FRB*, or *hst4Δ HST3-FRB RRP6-FRB* strains were spotted (1/10 dilutions) on 2% glucose media containing either DMSO solvent or 8  $\mu\text{g}/\text{mL}$  rapamycin (Rap), in the presence or absence of 0.1 M hydroxyurea (HU) and then grown for 3 days or 5 days at 30°C. **(B)** Genome browser view of the *ZNF1* gene that is regulated by Rrp6 displaying NET-seq data (bottom) for WT (blue) and *hst4Δ HST3-FRB* (green) as well as RNA-seq data for WT (blue), *hst4Δ HST3-FRB* (green), RRP6-FRB (gray), and *hst4Δ HST3-FRB RRP6-FRB* (orange). **(C)** RT-qPCR confirmation of exosome targets. Left, genes with increased transcription in the *hst4Δ HST3-FRB* mutant by NET-seq, but no change or decrease in RNA-seq. Increased in the RRP-FRB mutant and further increased in *hst4Δ HST3-FRB RRP6-FRB* mutant. Right, genes increased in both NET-seq and RNA-seq in the *hst4Δ HST3-FRB* mutant and further increased in the *hst4Δ HST3-FRB RRP6-FRB* mutant. RPP0 was also included as a control gene. P-values determined by student's t-test for 2 biological replicates. **(D)** Volcano plot shows ORF transcripts that change significantly in the RRP6 mutant (left) or the *hst4Δ HST3-FRB RRP6-FRB* (right) by RNA-seq. Significant genes are highlighted in blue ( $p_{\text{adj}} \leq 0.1$ ,  $\text{Log}_2$  fold change  $\geq 0.59$  or  $\leq -0.59$ ). **(E)** Representative genome browser view of a gene that is increased by NET-seq (bottom) in the *hst4Δ HST3-FRB* (green) compared to WT (blue), but does not change in RNA-seq (top) and is not an exosome target. WT (blue), *hst4Δ HST3-FRB* (green), RRP6-FRB (gray), and *hst4Δ HST3-FRB RRP6-FRB* (orange).

## Figure S4

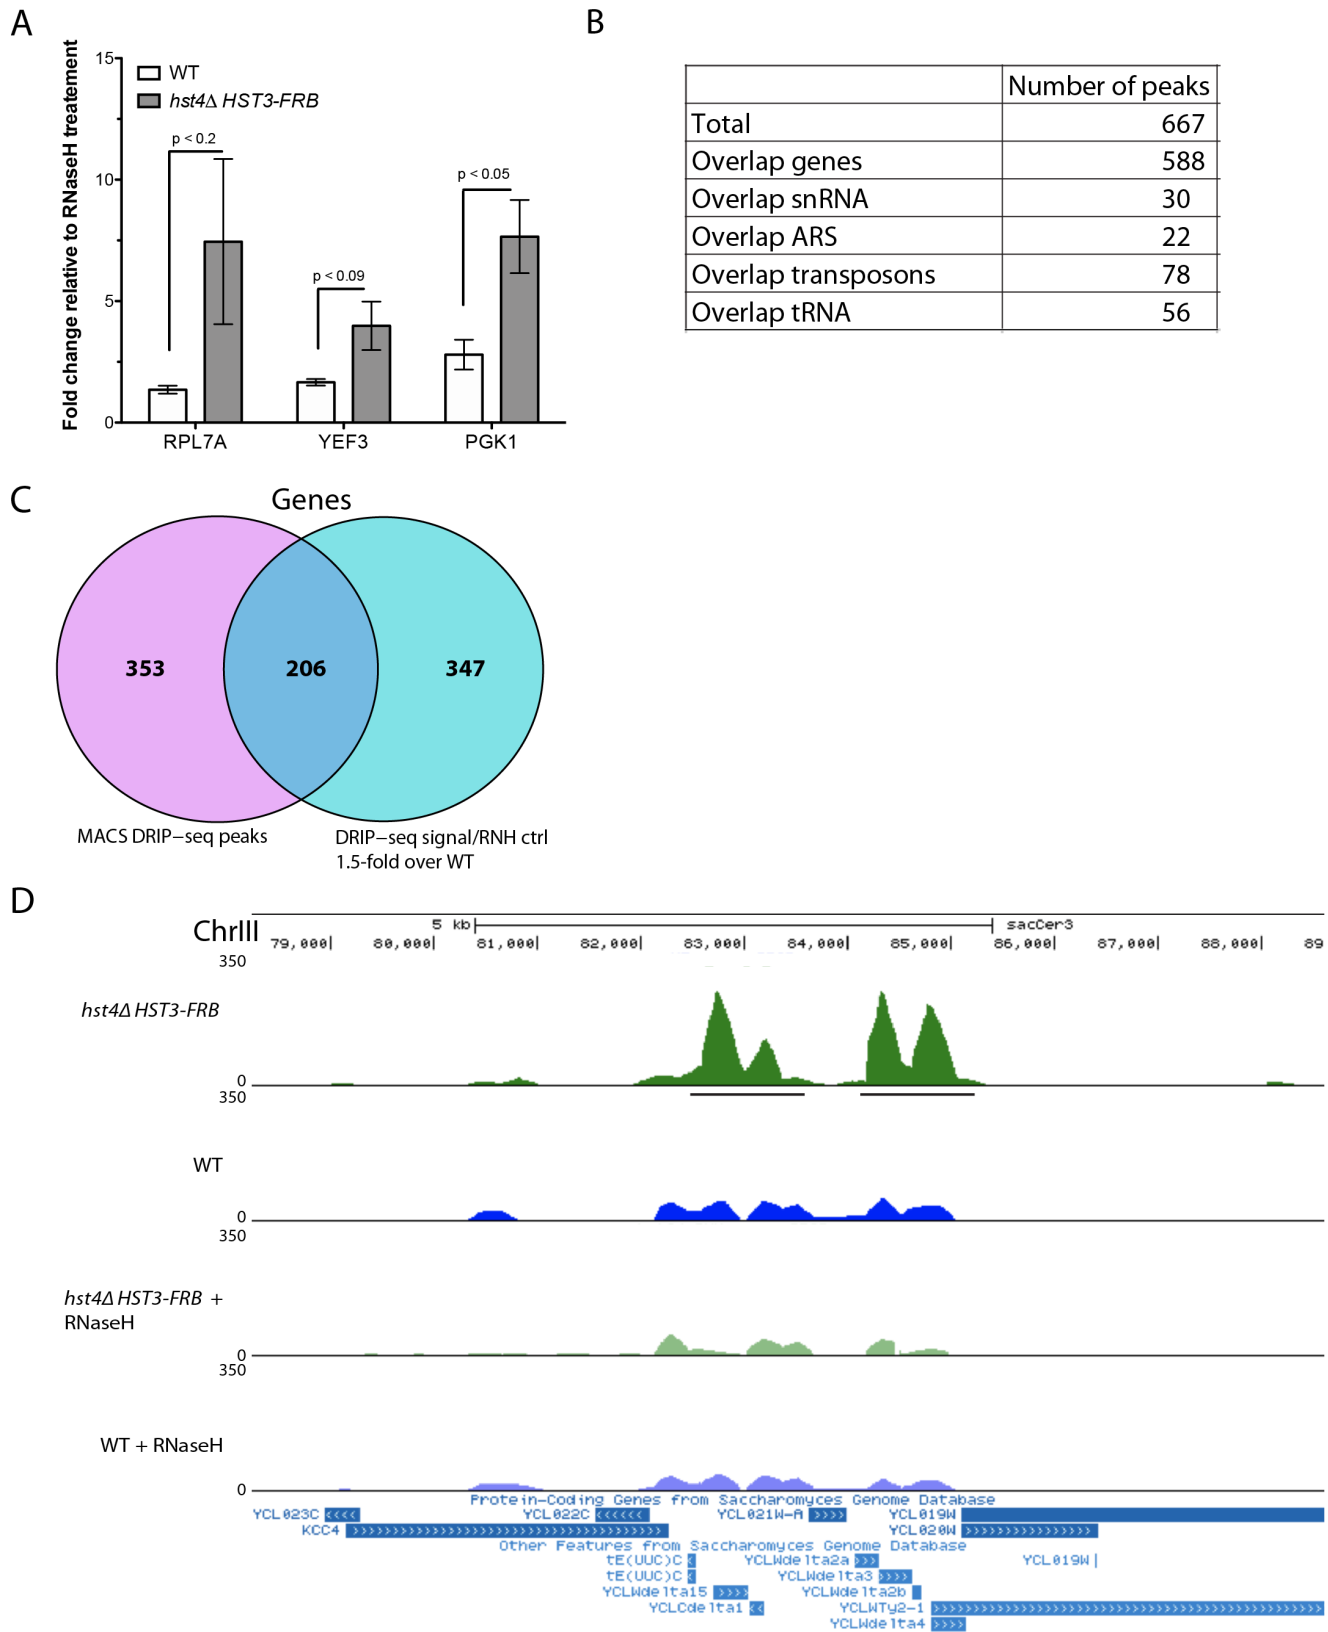

**Figure S4. Increased R-loop abundance in the absence of Hst3 and Hst4, related to Figure 5. (A)** DRIP-qPCR showing RNase-H normalized R-loop abundance in WT (white) and *hst4Δ HST3-FRB* (gray) for 3 biological replicates. Error bars represent standard error of the mean. P-values determined by student's t-test. **(B)** Distribution of DRIP-seq peaks determined by MACS for various genomic loci. **(C)** Venn diagram showing the overlap of DRIP-seq peaks at genes identified by MACS or by the method using an RNaseH control. **(D)** Representative genome browser view of normalized DRIP-seq reads in WT (blue) and *hst4Δ HST3-FRB* (green) cells at tRNA and transposon loci.

## Figure S5

A

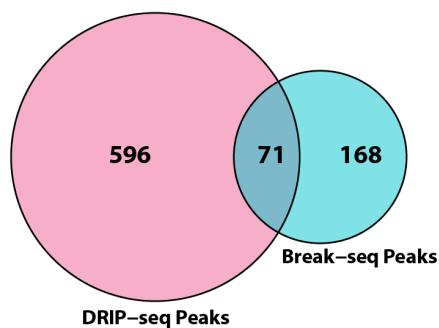

B

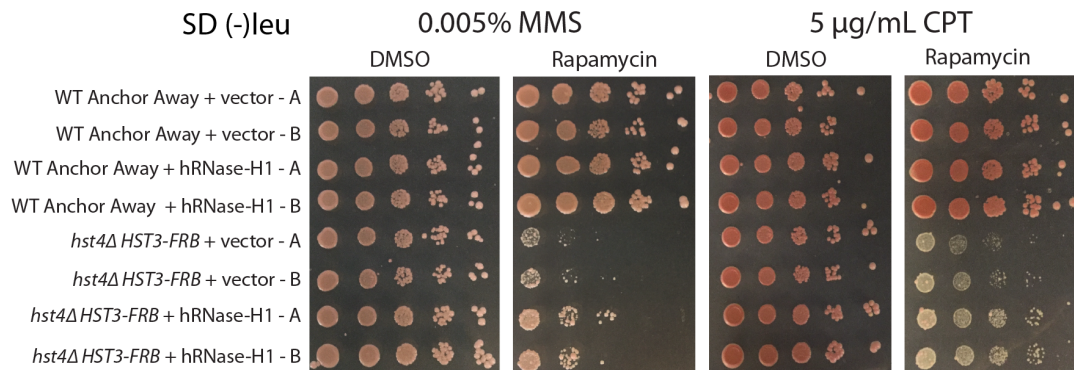

**Figure S5. R-loop formation and genomic stability, related to Figure 6. (A)** Venn diagram showing the overlap between Break-seq peaks and DRIP-seq peaks. **(B)** WT anchor away or *hst4* $\Delta$  *HST3-FRB* strains transformed with empty vector or a vector overexpressing human RNase-H1. Strains were spotted (1/10 dilutions) on 2% glucose media containing either DMSO solvent or 8  $\mu$ g/mL rapamycin in the presence of 0.005% MMS or 5  $\mu$ g/mL CPT and then grown for 3 days at 30°C. Two transformants were spotted for each strain.

**Table S3.**

| <b>Strains</b>  |                                                                                                                             |                                            |
|-----------------|-----------------------------------------------------------------------------------------------------------------------------|--------------------------------------------|
| <b>Name</b>     | <b>Genotype</b>                                                                                                             | <b>Source</b>                              |
| CY1827          | <i>MATa tor1-1 fpr1::loxP-LEU2-loxP RPL13A-2×FKBP12::loxP (HHY221) bar1Δ::HISG</i>                                          | Euroscarf (Haruki et al., 2008)            |
| CY2389          | <i>MATa tor1-1 fpr1::loxP-LEU2-loxP RPL13A-2×FKBP12::loxP (HHY221) bar1Δ::HISG HST3-FRB:kanMX6</i>                          | This study                                 |
| CY2390          | <i>MATa tor1-1 fpr1::loxP-LEU2-loxP RPL13A-2×FKBP12::loxP (HHY221) bar1Δ::HISG HST3-FRB:kanMX6 hst4Δ::HPH</i>               | This study                                 |
| CY2028          | W303 <i>MATa bar1Δ::his5+hst3Δ::NatMX hst4Δ::KanMX</i>                                                                      | P. Kaufman                                 |
| CY2394          | <i>MATa tor1-1 fpr1::loxP-LEU2-loxP RPL13A-2×FKBP12::loxP (HHY221) bar1Δ::HISG RPB3-FLAG:NAT</i>                            | This study                                 |
| CY2395          | <i>MATa tor1-1 fpr1::loxP-LEU2-loxP RPL13A-2×FKBP12::loxP (HHY221) bar1Δ::HISG HST3-FRB:kanMX6 hst4Δ::HPH RPB3-FLAG:NAT</i> | This study                                 |
| CY2474          | <i>MATa tor1-1 fpr1::loxP-LEU2-loxP RPL13A-2×FKBP12::loxP (HHY221) bar1Δ::HISG RRP6-FRB:HisMX6 RPB3-FLAG:NAT</i>            | This study                                 |
| CY1885          | <i>MATa tor1-1 fpr1::NAT RPL13A-2X FKBP12::TRP1 (HHY168)</i>                                                                | Euroscarf (Haruki et al., 2008)            |
| CY2393          | <i>MATa tor1-1 fpr1::NAT RPL13A-2X FKBP12::TRP1 (HHY168) HST3-FRB:kanMX6 hst4Δ::HPH</i>                                     | This study                                 |
| JY741/FLAG-Rpb3 | h- flag-rpb3 ade6-M216 ura4-D18 leu1                                                                                        | NBRP (Kimura et al., 2001)                 |
| <b>Plasmids</b> |                                                                                                                             |                                            |
| <b>Name</b>     | <b>Description</b>                                                                                                          | <b>Source</b>                              |
| CP1458          | pR5425-GPD                                                                                                                  | (Mumberg et al., 1995) From Elizabeth Tran |
| CP1459          | pR5425-GPD-human RNase H1                                                                                                   | (Wahba et al., 2011) From Elizabeth Tran   |

**Table S4.**

| <b>Primers</b>   |                  |                           |
|------------------|------------------|---------------------------|
| <b>Target</b>    | <b>Direction</b> | <b>Sequence</b>           |
| <b>RT-qPCR</b>   |                  |                           |
| EMF6             | Forward          | 5' AAGTGGTTGTGGCGGTAAAG   |
|                  | Reverse          | 5' CCACGCACAATCCAATAAA    |
| PTH4             | Forward          | 5' AACGGGCTTGCCCTTAAATC   |
|                  | Reverse          | 5' TCACTTCTGAGGAATCCAAGC  |
| ZNF1             | Forward          | 5' TTGTCTAAACCGCTGCTACG   |
|                  | Reverse          | 5' TCAAAGTTTCCTCGGATGG    |
| IRC15            | Forward          | 5' TCGGCGGCTATTTAACATGC   |
|                  | Reverse          | 5' CGTAAACTGCCGCAAATCC    |
| OLE1             | Forward          | 5' TTAACCGCTTTCGTCATTCC   |
|                  | Reverse          | 5' GGGGTTCTTCTGTCATCGAA   |
| PRM7             | Forward          | 5' AATTCCTTCACGACCACCAC   |
|                  | Reverse          | 5' TCAATGTTTGCGCTGCCTTC   |
| CIP1             | Forward          | 5' ACCGATCCAATCCCCTTATC   |
|                  | Reverse          | 5' AGAATTTGTGCGGGCTAAGA   |
| TIR1             | Forward          | 5' ATTCGCTGCTATTGCTGCTT   |
|                  | Reverse          | 5' GTCAGTGGCGGAAGCTAAAG   |
| MIP6             | Forward          | 5' TAGCTACGCCGATGAAACCT   |
|                  | Reverse          | 5' GCTGCGCAGATTTTCTTCTT   |
| YPR015C          | Forward          | 5' ACACGACCAAAAAGGGAAGTG  |
|                  | Reverse          | 5' AAGGTGCGTAATGGTAAGCG   |
| RPP0             | Forward          | 5' CGGTAACAAGGTCGGTCAAT   |
|                  | Reverse          | 5' AGCGGAAACGAAGTGAGAAA   |
| PDC1             | Forward          | 5' GGTTGGGACCACCTATCCTT   |
|                  | Reverse          | 5' TTGTGGAGCATCGAAGACTG   |
| <b>DRIP-qPCR</b> |                  |                           |
| RPL7A            | Forward          | 5' GATCTGCCTTGTATTGTCTTCG |
|                  | Reverse          | 5' TCAGCGGCCATTGTGATCTT   |
| YEF3             | Forward          | 5' GATTGCCGGTGGTAAGAAGA   |
|                  | Reverse          | 5' CGTAAGCATCACCCAATTCC   |
| PGK1             | Forward          | 5' GGACAAGCGTGTCTTCATCA   |
|                  | Reverse          | 5' CGTTTCTTTCACCGTTTGGT   |
